# Supplementary material for: Water uptake and energetics of the formation of barium zirconate based multicomponent oxides
Source: Royal Society of Chemistry journal article supplement (doi:10.1039/d2cp05265b), 2023-01-01
Supplement: d2cp05265b1.pdf [file d2cp05265b1.pdf]

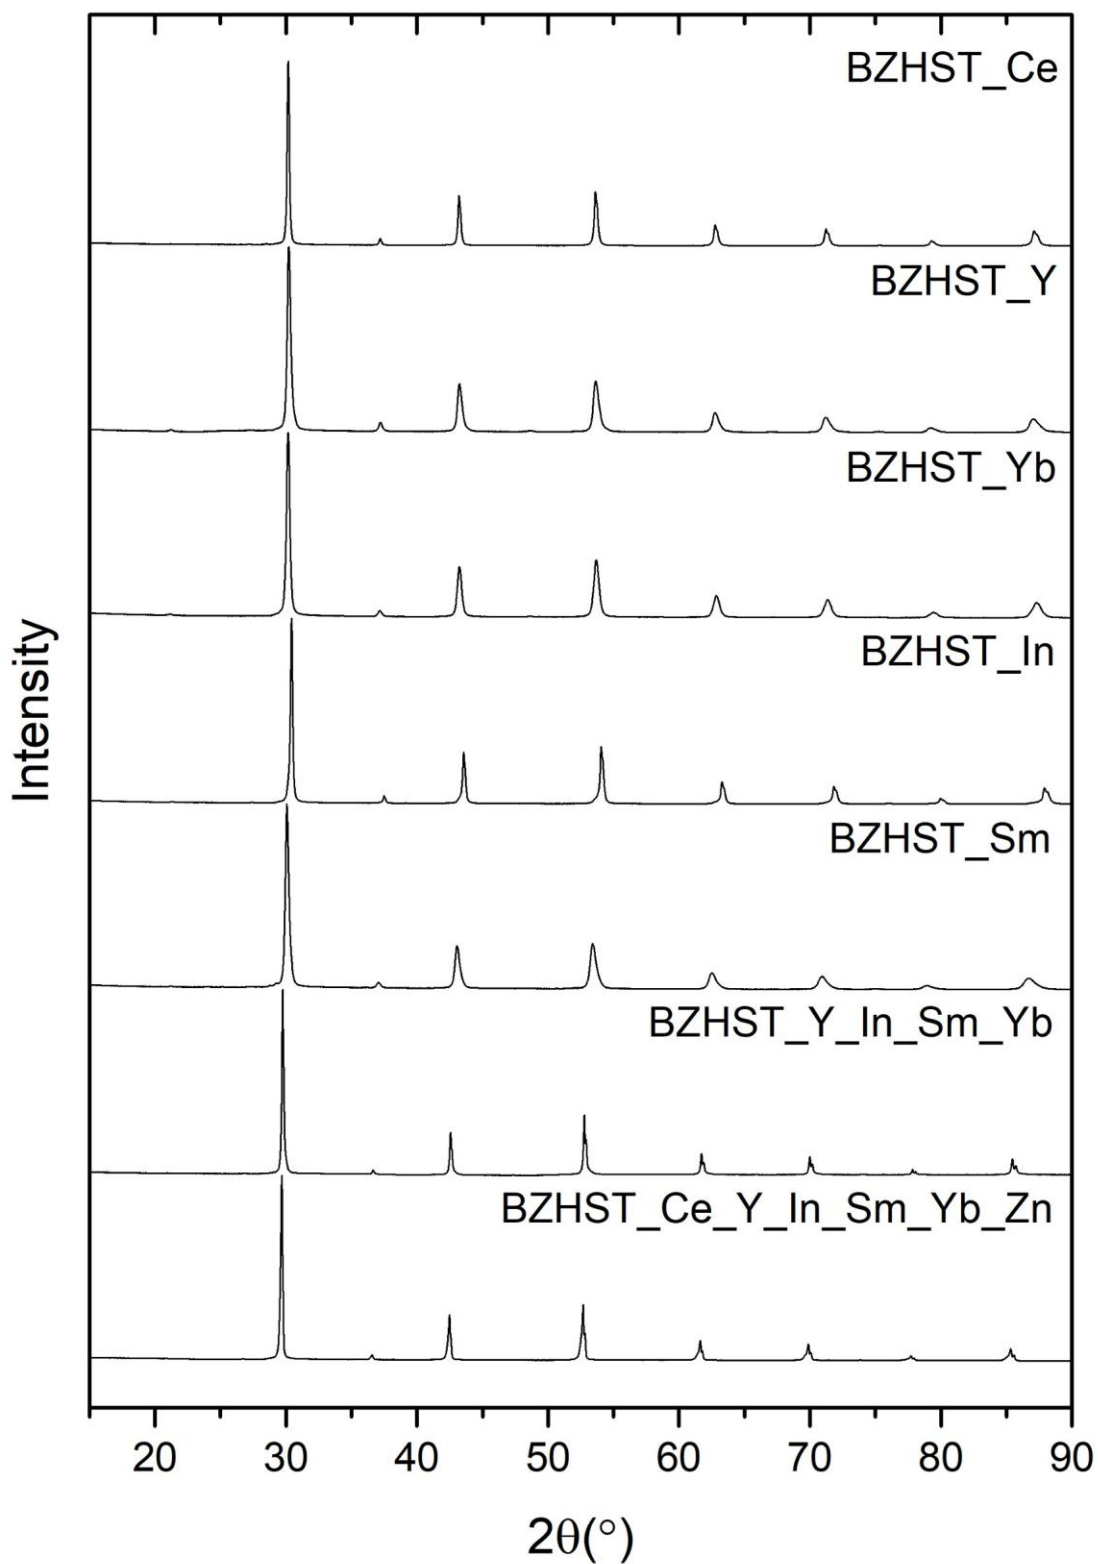

**Figure 1S** Diffraction patterns for all synthesized multicomponent oxides

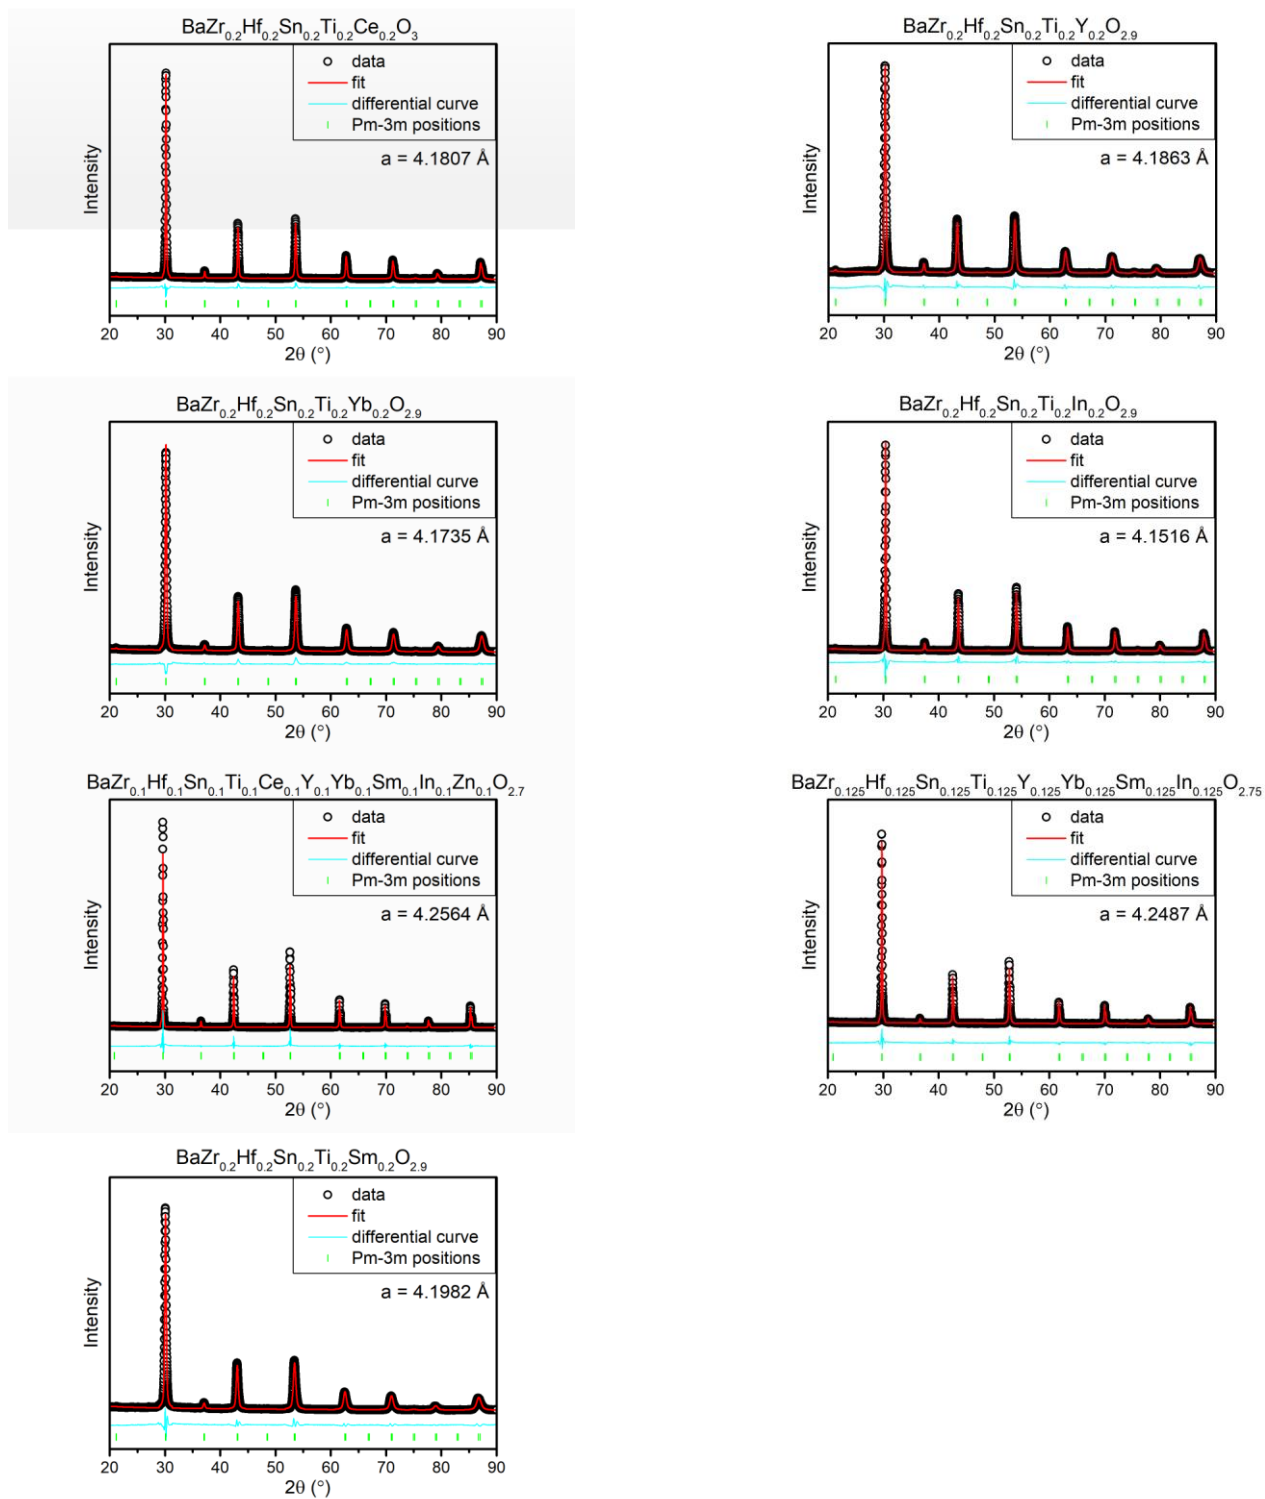

**Figure 2S** Rietveld refinements of diffraction patterns of all synthesized multicomponent oxides

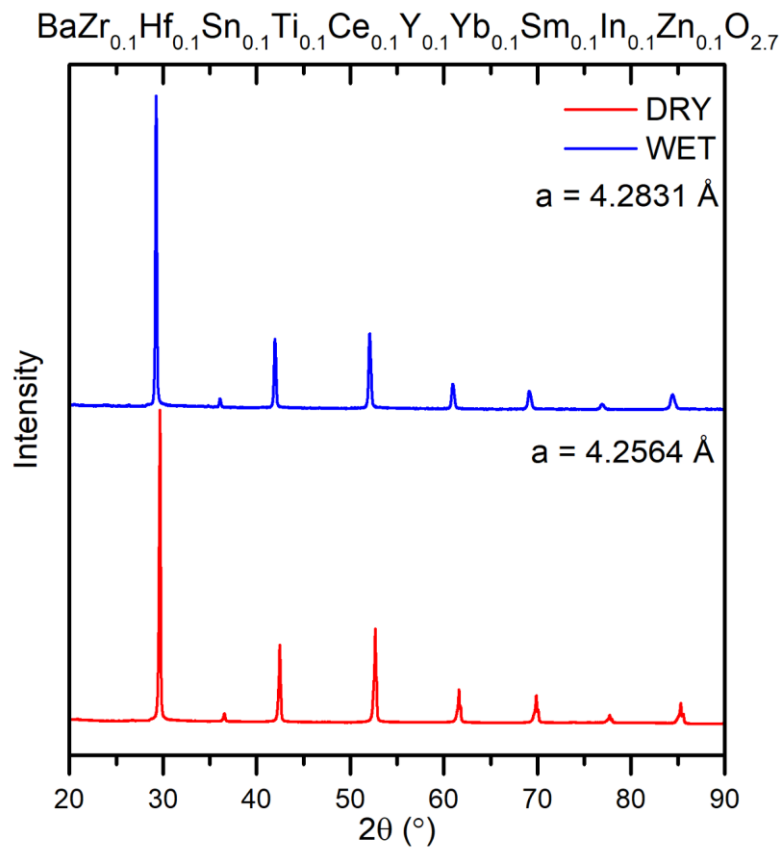

**Figure 3S** Comparison of diffraction patterns of dry and hydrated BZHST\_Ce\_Y\_In\_Sm\_Yb\_Zn sample.

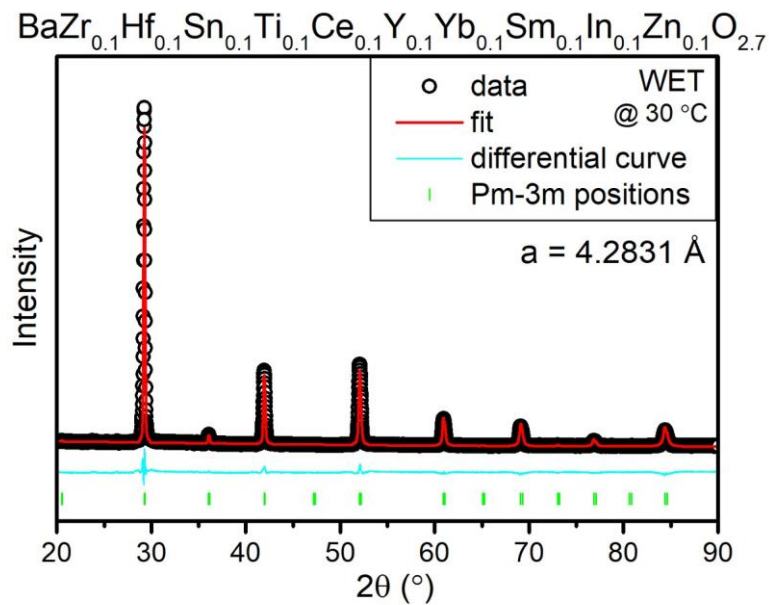

**Figure 4S** Rietveld refinement of diffraction pattern of hydrated BZHST\_Ce\_Y\_In\_Sm\_Yb\_Zn sample

| Sample ID              | Refinement quality |                |                 | Structural data |                              |                  |
|------------------------|--------------------|----------------|-----------------|-----------------|------------------------------|------------------|
|                        | R <sub>exp</sub>   | R <sub>p</sub> | R <sub>WP</sub> | a (Å)           | density (g/cm <sup>3</sup> ) | micro strain (%) |
| BZHST_Ce               | 0.79455            | 3.50065        | 4.58081         | 4.1807(1)       | 6.83                         | 0.11             |
| BZHST_Y                | 0.72324            | 3.64943        | 4.91302         | 4.1863(1)       | 6.54                         | 0.27             |
| BZHST_Yb               | 0.8244             | 3.05118        | 3.98956         | 4.1735(1)       | 6.98                         | 0.25             |
| BZHST_In               | 0.83595            | 3.98727        | 5.88821         | 4.1516(1)       | 6.82                         | 0.10             |
| BZHST_Sm               | 0.72601            | 3.032          | 4.1787          | 4.1982(1)       | 6.76                         | 0.30             |
| BZHST_Y_In_Sm_Yb       | 2.08172            | 3.91512        | 5.60402         | 4.2487(1)       | 6.53                         | 0.06             |
| BZHST_Ce_Y_In_Sm_Yb_Zn | 0.78597            | 5.70646        | 8.13871         | 4.2564(1)       | 6.40                         | 0.17             |

**Table 1S** Refinement quality and structural data derived from Rietveld refinement for all synthesized samples

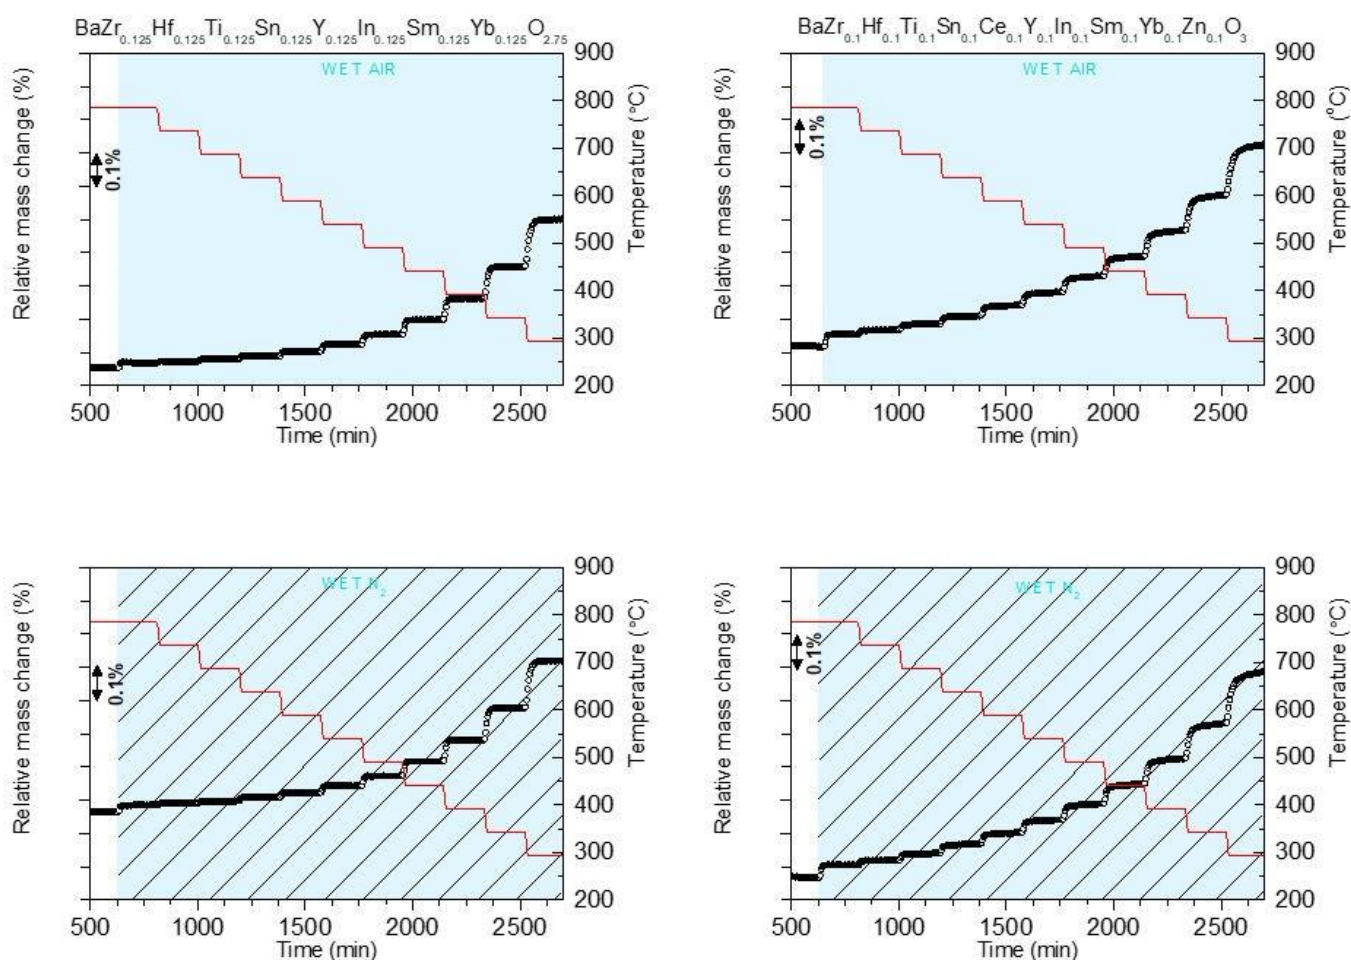

**Figure 5S** Mass change of BZHST\_Y\_In\_Sm\_Yb (left) and BZHST\_Ce\_Y\_In\_Sm\_Yb\_Zn (right) samples and temperature as a function of time under a water partial pressure of 0.019 atm collected in synthetic air and nitrogen atmospheres.
